# Supplementary material for: Imbalanced social-communicative and restricted repetitive behavior subtypes of autism spectrum disorder exhibit different neural circuitry
Source: PubMed Central journal article supplement (PMC8121854; doi:10.1038/s42003-021-02015-2), 2021-05-14
Supplement: 42003_2021_2015_MOESM2_ESM.pdf [file 42003_2021_2015_MOESM2_ESM.pdf]

## Description of Additional Supplementary Files

**File name:** Supplementary Data 1

**Description:** Source data for Figure 2.

**File name:** Supplementary Data 2

**Description:** Statistics from all functional connectivity comparisons.

**File name:** Supplementary Data 3

**Description:** Gene lists used for enrichment analyses.
